# Supplementary material for: A High-Throughput Drug Screening Assay for Anti-Tau Aggregation Using Split GFP and Flow Cytometry
Source: Research Square preprint supplement (doi:10.21203/rs.3.rs-6872645/v1), 2025-06-18
Supplement: Supplementary file 1 [file 7215bdcefab0d1ba6f67877a.docx]

**Title:**

A High-Throughput Drug Screening Assay for Anti-Tau Aggregation Using Split GFP and Flow Cytometry

**Authors**

Omnia M. H. Ibrahium1,; Taiwo A. Ademoye2; Jessica S Fortin2; Raluca Ostafe1*

1. Purdue Institute of Inflammation, Immunology and Infectious Diseases, Purdue University, West Lafayette, IN 47907, USA
2. Department of Basic Medical Sciences, College of Veterinary Medicine, Purdue University, West Lafayette, Indiana 47907, United States

Supplementary data

Figure S 1 MO-19-10, N-(3,4-dichlorophenyl)-N′-[2-(1H-indol-3-yl)ethyl]urea, chemical formula


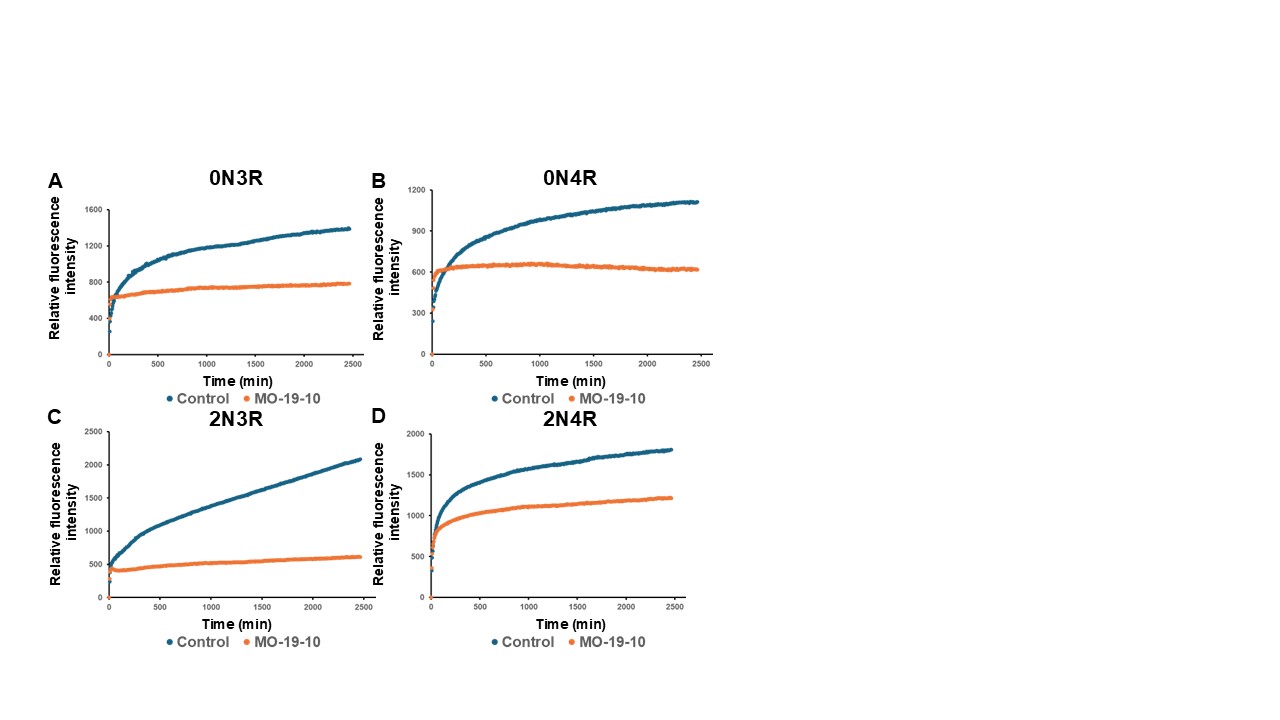


Figure S 2 MO-19-10, a urea-based compound, reduced the aggregation of tau 2N3R isoform by about 75% and other isoforms by less than 50%. The ThS fluorescence curves are indicative of the aggregation kinetics of tau isoform (A) 0N3R, (B) 0N4R, (C) 2N3R, and (D) 2N4R at 12 μM in PBS-treated with chelex beads. The solution was supplemented with 150 μM heparin, 5 mM dithiothreitol (DTT), 40 μM ThS, and 10 mg/mL arachidonic acid in order to induce the aggregation. The control condition contained 0.25% DMSO, while the urea compound was tested at a concentration of 100 μM. The data represented by each curve are an average of three independent replicates.
